# Supplementary material for: Notch regulates BMP responsiveness and lateral branching in vessel networks via SMAD6
Source: PubMed Central journal article supplement (PMC5114582; doi:10.1038/ncomms13247), 2016-11-11
Supplement: ncomms13247-s1.pdf [file ncomms13247-s1.pdf]

SUPPLEMENTARY INFORMATION: Supplementary Figures, Figure Legends and Tables.

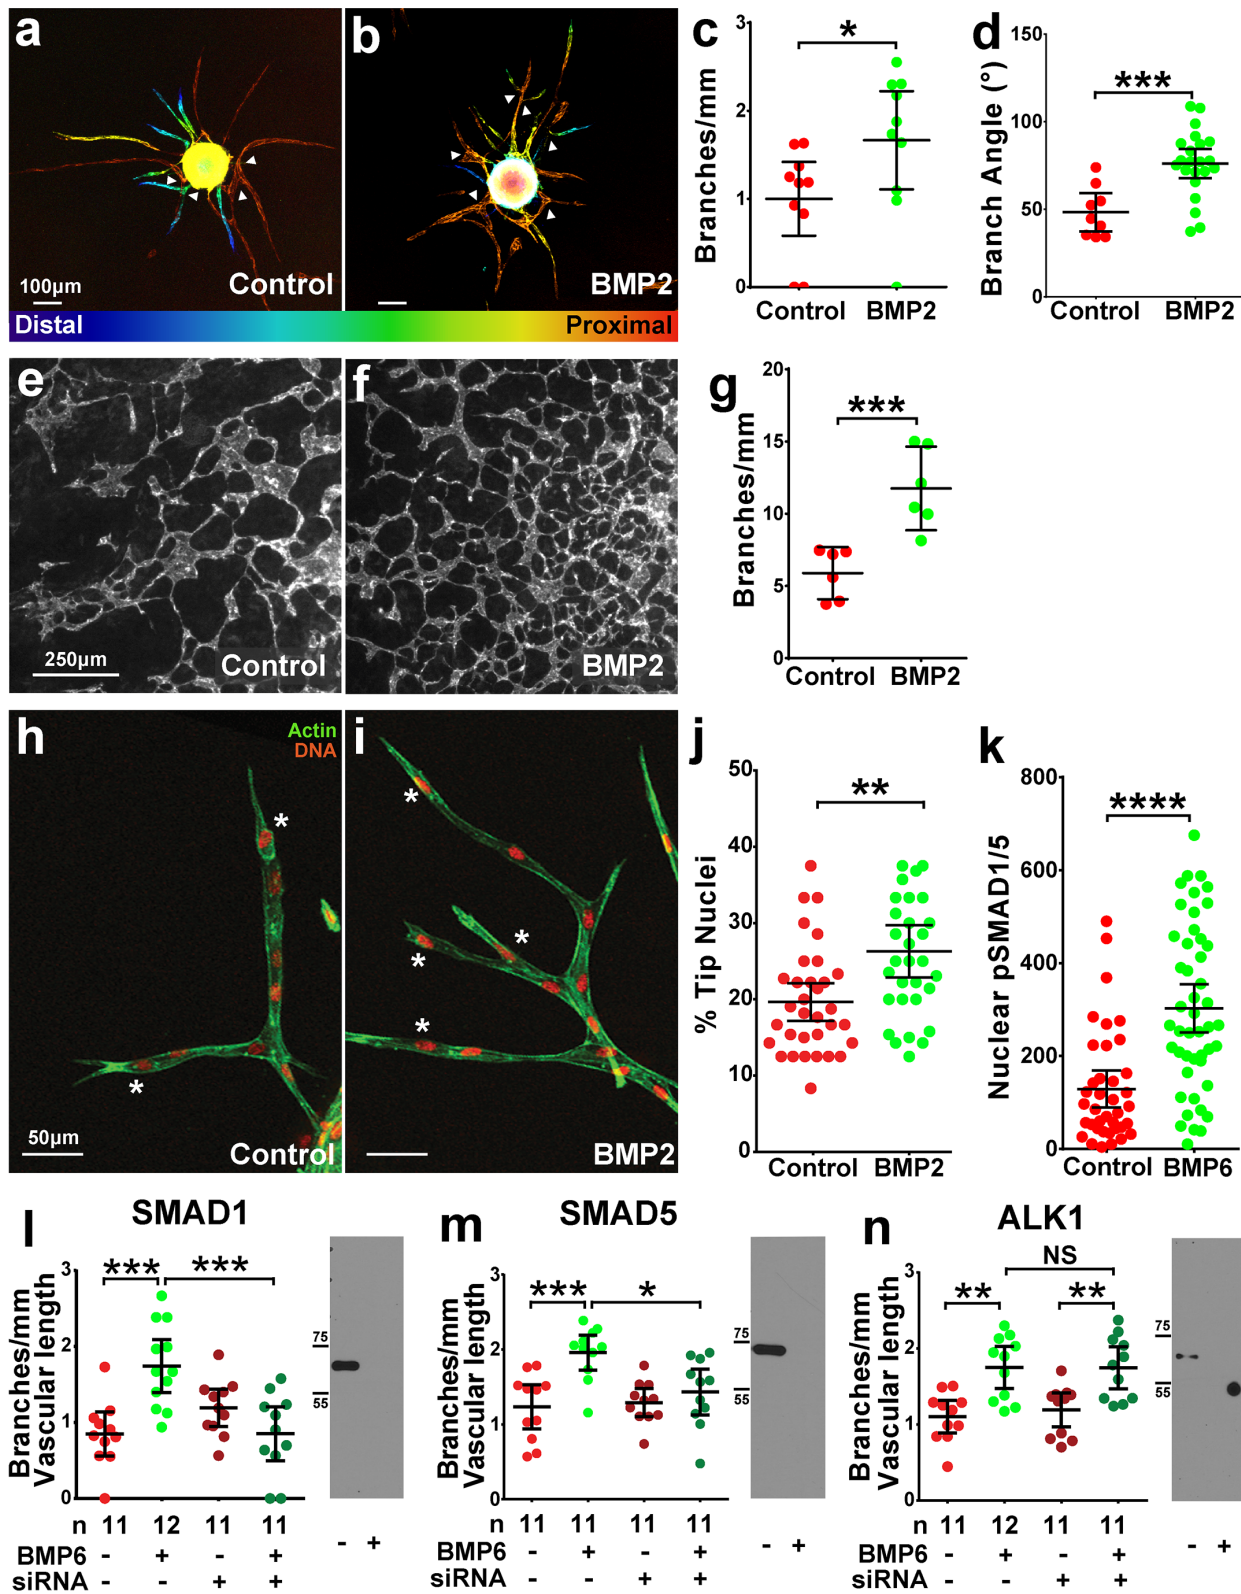

**Supplementary Figure 1 | Pro-angiogenic BMP ligands promote lateral branching.**

**(a-b)** HUVEC 3D sprouting assay +/- BMP2, visualized with phalloidin (actin) and depth-encoded. Arrowheads indicate branches. **(c-d)** Quantification of (c) branches/mm (n = 10 control and 10 BMP2 beads) and (d) branch angle (n = 9 control and 22 BMP2 angles), representative of 3 independent experiments. Error bars, mean +/- 95% CI. \*, p ≤ 0.05; \*\*\*, p ≤ 0.001 by Student's t-test. **(e-f)** Mouse ES cell-derived vessels stained for PECAM-1 with indicated treatments. **(g)** Quantification of branches/mm, representative of 3 independent experiments (n = 6 biological replicates for each condition). Error bars, mean +/- 95% CI. \*\*\*, p ≤ 0.001 by unpaired, two-tailed Student's t-test. **(h-i)** HUVEC 3D sprouting assay with control **(h)** or BMP2 **(i)** visualized with phalloidin (actin) or DRAQ7 (DNA). Asterisks, tip cell nuclei. **(j)** Quantification of tip nuclei/total nuclei/field, representative of 3 independent experiments (n = 33 control and 31 BMP2 sprouts). Error bars, mean +/- 95% CI. \*\*, p ≤ 0.01 by unpaired, two-tailed Student's t-test. **(k)** Quantification of mean pSMAD1/5 intensity per nucleus from Fig. 1h-i, representative of 2 independent experiments. Error bars, mean +/- 95% CI. \*\*\*\*, p ≤ 0.0001 by unpaired, two-tailed Student's t-test. **(l-n)** HUVEC 3D sprouting assay with control or BMP6 and indicated siRNA treatments, representative of 2 independent experiments (n indicated on graphs). Error bars, mean +/- 95% CI. \*, p ≤ 0.05; \*\*, p ≤ 0.01; \*\*\*, p ≤ 0.001 by 1-way ANOVA, with Tukey's post-hoc. Right panels, Western Blot of relevant proteins to show siRNA knockdown (**Supplementary Fig. 5b**). Left of panels, 55 kDa and 75 kDa markers.

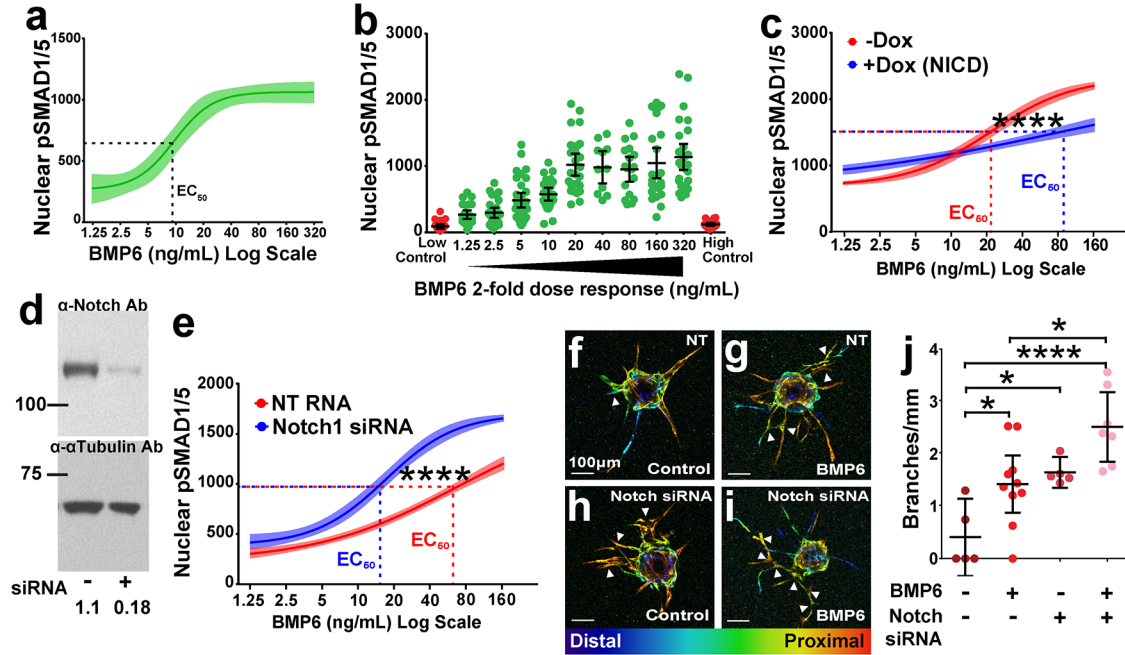

**Supplementary Figure 2 | Notch affects HUVEC BMP-responsiveness.**

(a) pSMAD1/5 nuclear fluorescence dose-response curve of HUVEC to increasing BMP6 for 90 min as indicated on the X-axis, representative of 2 independent experiments. Data are 4-parameter best-fit curves (solid lines) +/- 95% confidence bands (filled areas). (b) Raw spread-scatter data for pSMAD1/5 nuclear fluorescence response curve of HUVEC to increasing 90 min BMP6 treatments shown in panel a, representative of 2 independent experiments. Low and high controls, solvent % matched to the lowest/highest ligand concentrations. Data points, mean nuclear pSMAD1/5 fluorescence of individual nuclei; bars, population means +/- 95% CI. (c) BMP6 2-fold dose-response curves (indicated on X-axis) in HUVEC after 24 hr Notch activation (+DOX, blue line) compared to control (-DOX, red line). Data are 4-parameter best-fit curves (solid lines) of the population means +/- 95% confidence bands (shaded bands), representative of a single experiment. \*\*\*\*,  $p \leq 0.0001$  by non-linear regression. (d) Western blot 48 hr post-transfection of indicated siRNAs, showing knockdown of Notch1 in HUVEC. Left, size markers (kDa). Below, ratio of Notch/ $\alpha$ -tubulin signal (**Supplementary Fig. 5c**). (e) BMP6 2-fold dose-response curves (indicated on X-axis) in HUVEC 48 hr post-transfection with NT (red line) or Notch1-targeting siRNAs (blue line). Data are 4-parameter best-fit curves (solid lines) of the population means +/- 95% confidence bands (shaded areas), representative of 2 independent experiments. \*\*\*\*,  $p \leq 0.0001$  by non-linear regression. (f-i) 3D HUVEC sprouting assay with control (f-g) or Notch siRNAs (h-i) and with control (f,h) or BMP6 (g,i) daily from 2d-7d post-embedding, visualized with phalloidin (actin) or DRAQ7 (DNA) and depth-encoded. (j) Quantification of branches/mm per bead from a single experiment ( $n = 5$  NT/Control, 10 NT/BMP6, 5 Notch siRNA/Control, and 7 Notch siRNA/BMP6 beads). Data points, beads; bars, means +/- 95% CI. \*,  $p \leq 0.05$ ; \*\*\*\*,  $p \leq 0.0001$  by 1-way ANOVA with Tukey's post-hoc.

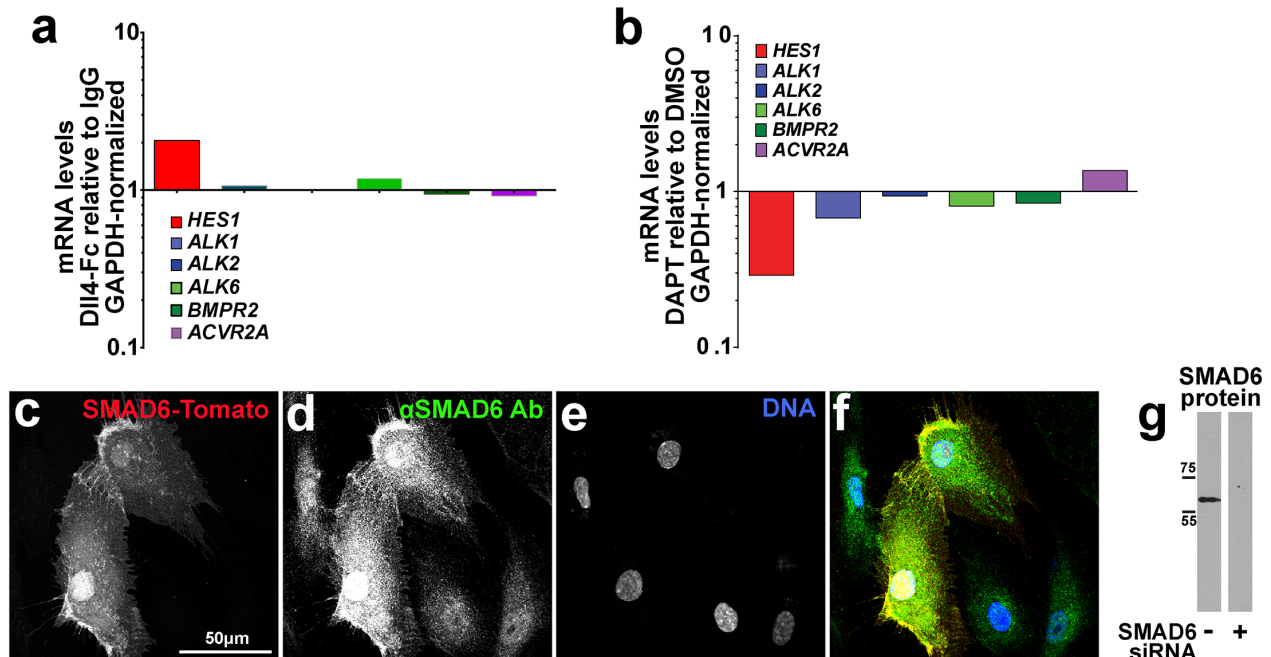

### Supplementary Figure 3 | Lack of Notch regulation of BMP receptors and validation of SMAD6 over-expression and knockdown reagents.

(a-b) qRT-PCR for BMP pathway receptor mRNAs and the Notch target, *HES1*, with Notch gain-of-function (DII4-Fc, (a)) or loss-of-function (DAPT, (b)). Data from single of 3 experiments, displayed as a log-conversion of the  $\Delta\Delta C_T$  vs. controls. (c-f) HUVEC infected with inducible SMAD6-tdTomato, 16 hr post-DOX treatment and visualized for SMAD6-tdTomato (red), antibody-detected SMAD6 (green), or DNA (blue). (g) Western blot of HUVEC transfected with indicated siRNAs. 55 and 75kDa molecular weight markers shown. (Supplementary Fig. 5d).



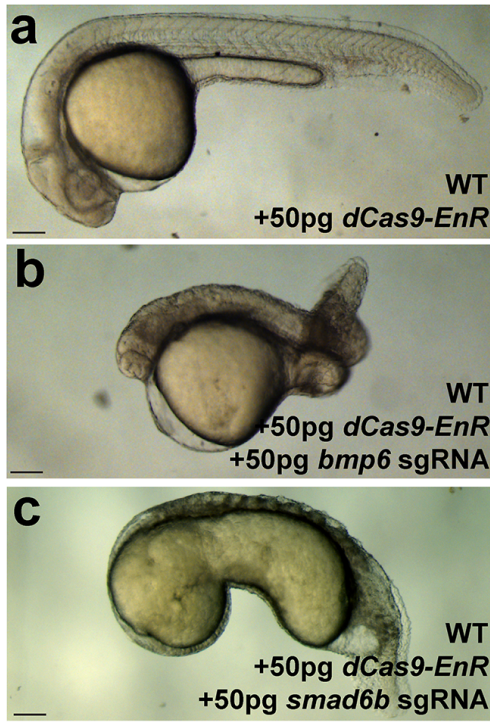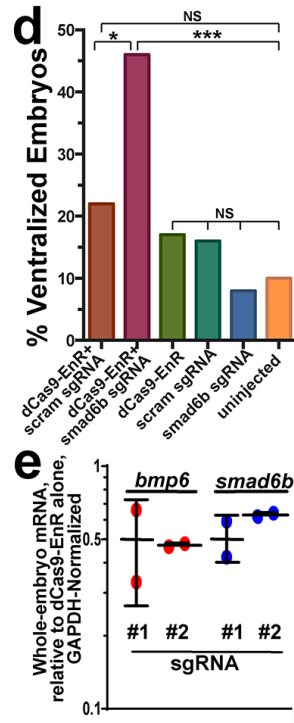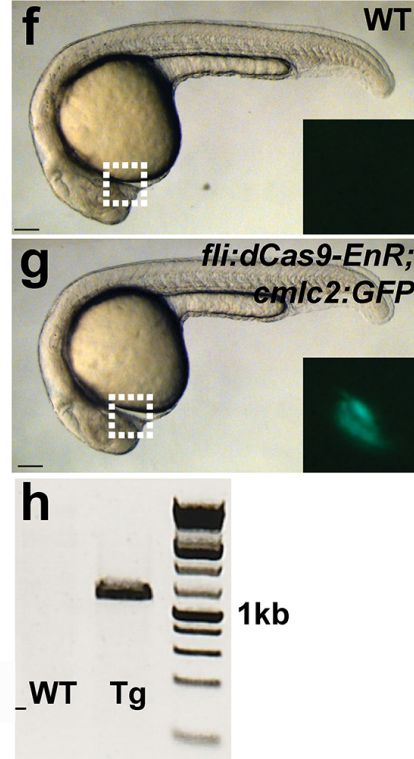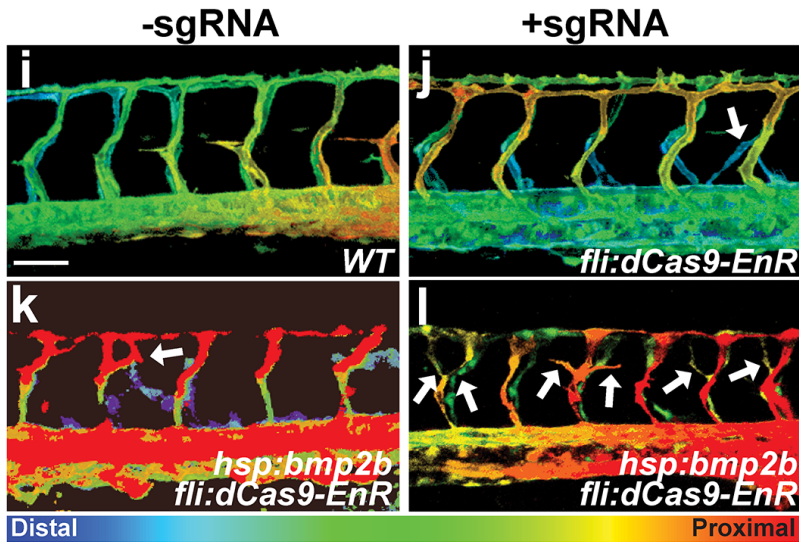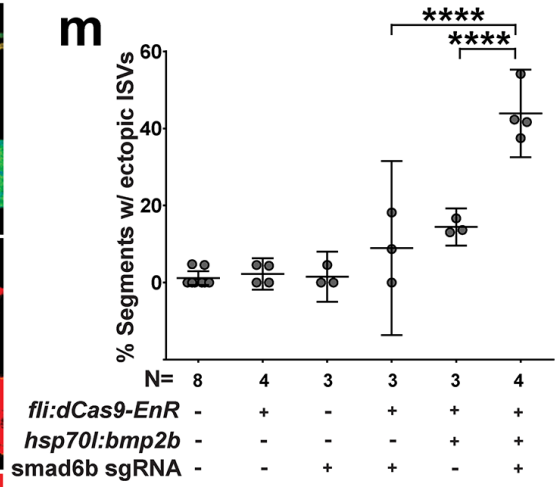

**Supplementary Figure 4 | SMAD6 mediates Notch-dependent suppression of BMP signaling and angiogenesis.**

**(a-c)** CRISPRi phenotypes with sgRNA manipulations (Scale bar, 100  $\mu$ m). **(a)** WT control injected with 50pg dCas9-EnR mRNA, **(b)** dCas9-EnR + 50pg *bmp6* sgRNA (predicted loss-of-function for BMP signaling), **(c)** dCas9-EnR + 50pg *smad6b* sgRNA (predicted gain-of-function for BMP signaling); two different sgRNAs produced the ventralized phenotype. **(d)** Quantification of early embryonic phenotypes of indicated injections. (#embryos: dCAS+scram=36; dCAS+smad6=57; dCas=48; scram=55; smad6=76; uninjected=101).  $\chi^2$  analysis; \*,  $p \leq 0.05$ ; \*\*\*,  $p \leq 0.001$ ; NS, not significant. **(e)** qRT-PCR of whole embryos for indicated mRNAs targeted with two unique sgRNAs each. Data points, replicated experiments using 25 embryos per condition, displayed as a log-conversion of the  $\Delta\Delta C_T$  vs. controls. **(f-g)** WT (f) or dCas9-EnR+ (with a linked *myl7:GFP* transgene - inset) (g) F1 embryos from *Tg(fli:dCas9-EnR)* and *Tg(hsp70l:bmp2b)* crosses were indistinguishable by gross morphology and developmental staging. Scale bar, 100  $\mu$ m. **(h)** RT-PCR with dCas9-EnR primers from 24hpf mRNA from WT (left) or *Tg(fli:dCas9-EnR)* (Tg, right) embryos. dCas9-EnR PCR product is at expected size (~1.2kb) (**Supplementary Fig. 5e**). All embryos are at 24 hpf. **(i-l)** Heat-shocked F1 embryos (heat shock at 26 hpf, analyze at 44-46 hpf) from *Tg(fli:dCas9-EnR)* and *Tg(hsp70l:bmp2b;Tg(kdrl:GFP)* crosses, uninjected or injected with *smad6b* sgRNAs. Arrows, ectopic ISV sprouts. Panels k and l have Z planes with ectopic venous sprouts removed. **(m)** Quantification of arterial vascular defects (% segments with ectopic ISVs) in heat-shocked embryos of indicated genotypes, representative of 2 independent experiments, N values on graph. Error bars, mean +/- SEM; \*,  $p \leq 0.05$ ; \*\*\*\*,  $p \leq 0.0001$  by 1-way ANOVA, with Tukey's post-hoc.

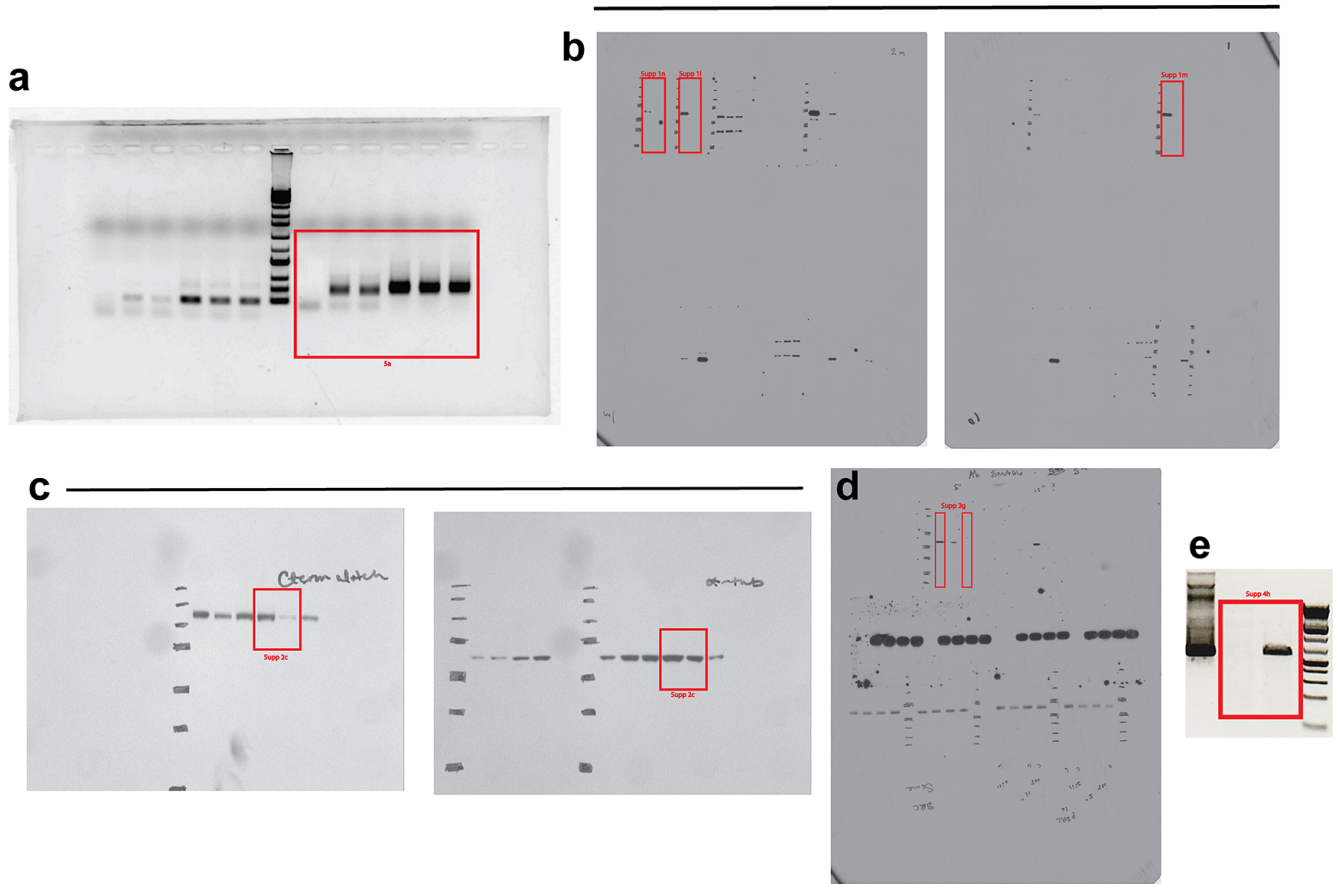

**Supplementary Figure 5 | Original gels and Western blots.**

**(a)** Gel Fig. 5a. **(b)** Blots Supplementary Fig. 1. **(c)** Blots Supplementary Fig. 2. **(d)** Blot Supplementary Fig. 3. **(e)** Gel Supplementary Fig. 4.

## Supplementary Table 1. Antibodies.

| Antibody                               | Species | Assay | Dilution | 2° Ab Dilution | 1° Ab Incubation | Blocking Buffer | Ab Buffer   | Vendor         | Catalog # | Observed MW |
|----------------------------------------|---------|-------|----------|----------------|------------------|-----------------|-------------|----------------|-----------|-------------|
| $\alpha$ -Alk1                         | RabMab  | WB    | 1:2000   | 1:2000         | O/N @ 4°         | 5% NFM/PBST     | 1% NFM/PBST | AbCam          | ab108207  | 65kDa       |
| a-FLAG M2 Monoclonal                   | MusMab  | WB    | 1:2000   | 1:5000         | O/N @ 4°         | 5% NFM/PBST     | 1% NFM/PBST | Sigma          | F1804     |             |
| $\alpha$ -pSmad1(S463(S5))/5(S463(S5)) | RabMab  | WB    | 1:5000   | 1:5000         | O/N @ 4°         | 5% NFM/PBST     | 1% NFM/PBST | Cell Signaling | 9516      | 60kDa       |
| $\alpha$ -SMAD1                        | RabMab  | WB    | 1:20000  | 1:20000        | O/N @ 4°         | 5% NFM/PBST     | 1% NFM/PBST | Cell Signaling | 6944      | 60kDa       |
| $\alpha$ -SMAD5                        | RabMab  | WB    | 1:5000   | 1:5000         | O/N @ 4°         | 5% NFM/PBST     | 1% NFM/PBST | Cell Signaling | 12534     |             |
| $\alpha$ -SMAD6                        | RabPab  | WB    | 1:5,000  | 1:10000        | O/N @ 4°         | 5% NFM/PBST     | 1% NFM/PBST | AbCam          | ab13727   | 50kDa       |

| Antibody                               | Species | Assay | Dilution | 2° Ab Dilution | 1° Ab Incubation | Blocking Buffer                          | Ab Buffer                                | Vendor         | Catalog # | Observed MW |
|----------------------------------------|---------|-------|----------|----------------|------------------|------------------------------------------|------------------------------------------|----------------|-----------|-------------|
| $\alpha$ -pSmad1(S463(S5))/5(S463(S5)) | RabMab  | 2D IF | 1:1000   | 1:1000         | O/N @ 4°         | 5% GS/1%<br>BSA/0.3% Triton-<br>X100/PBS | 5% GS/1%<br>BSA/0.3% Triton-<br>X100/PBS | Cell Signaling | 9516      |             |
| $\alpha$ -pSmad1(S463(S5))/5(S463(S5)) | RabMab  | 3D IF | 1:250    | 1:1000         | 48h @ 4°         | 5% GS/1%<br>BSA/0.3% Triton-<br>X100/PBS | 5% GS/1%<br>BSA/0.3% Triton-<br>X100/PBS | Cell Signaling | 9516      |             |
| $\alpha$ -VE-cadherin                  | RabMab  | 2D IF | 1:2000   | 1:2000         | O/N @ 4°         | 5% GS/1%<br>BSA/0.3% Triton-<br>X100/PBS | 5% GS/1%<br>BSA/0.3% Triton-<br>X100/PBS | Cell Signaling | 2500P     |             |

| Antibody       | Species | Assay | Vendor         | Catalog # |
|----------------|---------|-------|----------------|-----------|
| $\alpha$ -RBPJ | RabMab  | ChIP  | Cell Signaling | 5313s     |
| $\alpha$ -RBPJ | RabPab  | ChIP  | Abcam          | ab25949   |

## Supplementary Table 2. siRNA Oligonucleotides.

| siRNA target          | Catalog Number  | Targeted Exon | RefSeq       | Vendor            |
|-----------------------|-----------------|---------------|--------------|-------------------|
| Non-targeting control | 4390847         | N/A           | N/A          | Life Technologies |
| SMAD6                 | 4427037 (s8410) | 4             | NM 005585    | Life Technologies |
| SMAD6                 | 4427037 (s8411) | 3             | NM 005585    | Life Technologies |
| Notch1                | 4427037 (s9633) | 22,23         | NM 017617    | Life Technologies |
| Notch1                | 4427037 (s9635) | 27            | NM 017617    | Life Technologies |
| SMAD1                 | 4427037 (s8395) | 3             | NM 005900    | Life Technologies |
| SMAD1                 | 4427037 (s8396) | 7             | NM 005900    | Life Technologies |
| SMAD5                 | 4427037 (s8406) | 6             | NM 001001419 | Life Technologies |
| SMAD5                 | 4427037 (s8407) | 4             | NM 001001419 | Life Technologies |
| ACVRL1 (ALK1)         | 4427037 (s986)  | 2             | NM 001077401 | Life Technologies |
| ACVRL1 (ALK1)         | 4427037 (s987)  | 9             | NM 001077401 | Life Technologies |

**Supplementary Table 3. RT-PCR Primers and sgRNA Sequences.**

| Gene (Homo sapiens) | F Primer (5'-->3')        | R Primer (5'-->3')       | Vendor | Catalog Number |
|---------------------|---------------------------|--------------------------|--------|----------------|
| ACVRL1 (ALK1)       | Proprietary sequence      | Proprietary sequence     | BioRad | qHsaCID0021337 |
| ACVR1 (ALK2)        | Proprietary sequence      | Proprietary sequence     | BioRad | qHsaCID0012283 |
| ACVR2A              | Proprietary sequence      | Proprietary sequence     | BioRad | qHsaCID0014728 |
| BMPRI1B (ALK6)      | Proprietary sequence      | Proprietary sequence     | BioRad | qHsaCID0021330 |
| BMPR2               | Proprietary sequence      | Proprietary sequence     | BioRad | qHsaCID0008240 |
| GAPDH               | Proprietary sequence      | Proprietary sequence     | BioRad | qHsaCID0038674 |
| HES1                | ATCTGAGCACAGAAAGTCATCAAAG | GGATGCTCTGAAGAAAGATAGCTC | N/A    | N/A            |
| SMAD6               | Proprietary sequence      | Proprietary sequence     | BioRad | qHsaCID0017103 |

| Gene (Danio rerio) | F Primer (5'-->3')        | R Primer (5'-->3')        | Vendor | Catalog Number |
|--------------------|---------------------------|---------------------------|--------|----------------|
| <i>bmp6</i>        | ATGTGAGTTTCAGAGAATTGAGCTG | ACCAGTGTCTGTACTATTGCATGAT | N/A    | N/A            |
| <i>gapdh</i>       | TGTGATGGGAGTCAACCAGGACAA  | TTAGCCAGAGGAGCCAAGCAGTTA  | N/A    | N/A            |
| <i>smad6b</i>      | GTCAGATTCCACACTGTCTTACACT | ACGTTACACCAGTGACTCTGCCT   | N/A    | N/A            |

**FACS sorted EC primers**

|                |                       |                        |          |     |
|----------------|-----------------------|------------------------|----------|-----|
| <i>ef1a</i>    | AGGACATCCGTCGTGGTAAT  | AGAGATCTGACCAGGGTGGTT  | Eurofins | N/A |
| <i>gapdh</i>   | TGACCTGATGGCACACATGG  | TGGGAGAATGGTCGCGTATC   | Eurofins | N/A |
| <i>smad6b</i>  | AGGGGAATTCAGATGCCAG   | GGTACACCGTATAGAGGCGG   | Eurofins | N/A |
| <i>notch1b</i> | TGCGAGAACAAACACACCTGA | CTGGCAGTAGTTGCCAGTGA   | Eurofins | N/A |
| <i>dll4</i>    | AACTGCGAGAGAAGGATGGAC | CCCAGGATCAAACACAAGCCA  | Eurofins | N/A |
| <i>efnb2</i>   | ACCTACCAGTTACCCTCCC   | CCATCTCCCTTATCTTCCCA   | Eurofins | N/A |
| <i>lyve1</i>   | ACAIGCAGGTTTGGTTGGGT  | CTGATCTCAGCTCTCCAAGTGA | Eurofins | N/A |

| sgRNA (Danio rerio)      | Sequence            | Vendor | Catalog Number |
|--------------------------|---------------------|--------|----------------|
| <i>smad6b</i> #1         | AACCCTAAGGAAAGCCCT  | N/A    | N/A            |
| <i>smad6b</i> #2         | CGACCCGCTCGGGGTCAT  | N/A    | N/A            |
| <i>bmp6</i> #1           | TTCTTCACTGGTTCCTAC  | N/A    | N/A            |
| <i>bmp6</i> #2           | ACAGCGCTCTGICTCAG   | N/A    | N/A            |
| <i>scrambled (scram)</i> | GCTGATCTATCGGGTCGTC | N/A    | N/A            |
